# Supplementary material for: RECQ1 Promotes Stress Resistance and DNA Replication Progression Through PARP1 Signaling Pathway in Glioblastoma
Source: Frontiers journal article supplement (doi:10.3389/fcell.2021.714868), 2021-07-26
Supplement: Data_Sheet_1.ZIP [file Data_Sheet_1.ZIP]

## Sheet: Fig.1a
Fig.1a Western blot
	RPE1	M059K	U251	U87MG
relative level	1	3.08	2.86	3.02
		3.16	3.09	2.94
		2.95	2.97	3.18
	t-test
	M059K vs RPE1
	Group Name	N	Missing	Mean	Std Dev
	Col 1	3	0	1	0
	Col 2	3	0	3.063	0.106			Mean+s.d., p-value, two-tailed t-test, n=3 biological replicates
	Two-tailed P-value = 0.000878
	The difference in the median values between the two groups is greater than would be expected by chance; there is a statistically significant difference (P = <0.001)
	U251 vs RPE1
	Group Name	N	Missing	Mean	Std Dev
	Col 1	3	0	1	0
	Col 3	3	0	2.973	0.115
	Two-tailed P-value = 0.00113
	The difference in the median values between the two groups is greater than would be expected by chance; there is a statistically significant difference (P = <0.001)
	U87MG vs RPE1
	Group Name	N	Missing	Mean	Std Dev
	Col 1	3	0	1	0
	Col 4	3	0	3.047	0.122
	Two-tailed P-value = 0.00119
	The difference in the median values between the two groups is greater than would be expected by chance; there is a statistically significant difference (P = <0.001)

## Sheet: Fig.1b
Fig.1b PLA RECQ1+PCNA
NT	MMS
1	20
6	5		Mann-Whitney Rank Sum Test
2	18		MMS vs NT
1	23		Group	N	Missing	Median	0.25	0.75
4	18		Col 1	80	0	5	2	7.75
17	15		Col 2	77	0	15	10.5	18
3	15
0	12		Mann-Whitney U Statistic= 602.000
1	3		T = 8561.000 n(small)= 77 n(big)= 80 (P = <0.001)
7	5		The difference in the median values between the two groups is greater than would be expected by chance; there is a statistically significant difference (P = <0.001)
12	8
3	10
10	16
6	18
2	16
1	15
5	19
1	3
3	21
1	24		Mean+s.e.m., p-value,Mann-Whitney Rank Sum Test, n=3 biological replicates
6	10
2	21
1	18
7	15
8	13
2	18
4	13
1	15
6	16
2	14
5	18
7	10
2	21
9	23
2	16
6	17
15	18
7	21
3	20
9	17
2	19
6	16
8	14
11	18
2	13
7	14
19	10
6	14
3	2
7	5
2	8
5	19
8	15
4	15
9	12
2	14
5	16
6	12
9	15
10	7
13	12
10	9
3	12
6	8
8	7
2	6
7	12
3	10
5	15
6	20
1	13
9	11
4	15
7	16
2	12
8	17
2	10
6
8
5

## Sheet: Fig.1c
Fig.1c pRPA
untreated		MMS
siNC	siRECQ1	siNC	siRECQ1
3.1	3.9	10.8	79.4
3.8	5.1	15.3	80.3
5.2	6.1	18.5	76.6
t-test
untreated siRECQ1 vs siNC
Group Name	N	Missing	Mean	Std Dev
Col 1	3	0	4.033	1.069
Col 2	3	0	5.033	1.102			Mean+s.d., p-value, two-tailed t-test, n=3 biological replicates
Two-tailed P-value = 0.322
The difference in the mean values of the two groups is not great enough to reject the possibility that the difference is due to random sampling variability. There is not a statistically significant difference between the input groups (P = 0.322).
MMS siRECQ1 vs siNC
Group Name	N	Missing	Mean	Std Dev
Col 3	3	0	14.867	3.868
Col 4	3	0	78.767	1.93
Two-tailed P-value = 0.000151
The difference in the mean values of the two groups is greater than would be expected by chance; there is a statistically significant difference between the input groups (P = <0.001).

## Sheet: Fig. 1d
Fig.1d relative pRPA of western
MMS
siNC	siRECQ1
1	3.66
1	3.21
1	2.97
t-test
MMS siRECQ1 vs siNC
Group Name	N	Missing	Mean	Std Dev			Mean+s.d., p-value, two-tailed t-test, n=3 biological replicates
Col 1	3	0	1	0
Col 2	3	0	3.28	0.350286
Two-tailed P-value < 0.001
The difference in the mean values of the two groups is greater than would be expected by chance; there is a statistically significant difference between the input groups (P = <0.001).

## Sheet: Fig.1f
Fig.1f Fiber ratio MMS
M059K		U251			Mann-Whitney Rank Sum Test
siNC	siRECQ1	siNC	siRECQ1		M059K siRECQ1 siNC
1.26	0.68	1.03	0.59		Group	N	Missing	Median	0.25	0.75
1.03	0.59	1.08	0.42		Col 1	113	0	0.94	0.61	1.09
0.92	0.27	1.52	0.59		Col 2	116	0	0.68	0.482	0.847
0.98	0.36	1.61	0.25		Mann-Whitney U Statistic= 3793.000
0.86	0.34	1.06	0.78		T = 15756.000 n(small)= 113 n(big)= 116 (P = <0.001)
1.09	0.15	1.19	1.26		The difference in the median values between the two groups is greater than would be expected by chance; there is a statistically significant difference (P = <0.001)
1.03	0.27	1.37	0.56		U251 siRECQ1 vs siNC
1.29	0.23	0.99	0.48		Group	N	Missing	Median	0.25	0.75
1.07	0.59	0.58	0.26		Col 3	112	0	0.875	0.58	1.12
0.92	0.81	0.61	0.36		Col 4	119	0	0.59	0.46	0.88
0.94	0.79	0.49	0.56		Mann-Whitney U Statistic= 4509.000
0.67	0.72	0.79	0.28		T = 15147.000 n(small)= 112 n(big)= 119 (P = <0.001)
0.72	0.94	0.59	0.95		The difference in the median values between the two groups is greater than would be expected by chance; there is a statistically significant difference (P = <0.001)
0.88	0.92	0.37	0.58
1.02	0.89	0.29	0.46
1.06	0.76	0.38	0.47
1.05	0.42	0.34	0.16
1.26	0.18	0.26	0.23
1.43	0.26	0.77	0.77
1.17	0.85	0.76	0.67
0.94	0.39	0.74	0.69
0.97	0.68	0.59	0.59
0.38	0.84	0.39	0.25
0.56	0.76	0.98	0.75
0.67	0.89	0.89	0.48		Mean+s.e.m., p-value,Mann-Whitney Rank Sum Test, n=3 biological replicates
0.69	0.96	0.88	0.86
0.29	0.86	1.68	0.13
0.76	0.59	1.82	0.69
0.34	0.76	1.49	0.5
0.68	0.82	1.36	0.9
0.29	0.77	1.58	0.54
0.94	1.03	0.94	0.46
1.06	0.97	0.56	0.82
1.03	0.59	0.57	0.77
0.99	0.87	0.66	0.91
0.94	0.58	0.49	0.73
0.56	1.03	0.39	0.72
1.25	1.08	0.37	0.16
1.07	0.96	0.64	0.89
1.09	0.77	0.59	0.76
1.18	0.67	0.89	0.77
0.99	0.56	0.64	0.86
0.95	0.52	0.88	0.49
0.38	0.89	0.59	0.69
0.46	0.38	0.56	0.92
0.78	0.84	0.58	0.76
1.06	0.79	0.46	0.72
1.07	0.57	0.79	0.16
1.26	0.72	1.25	0.73
1.35	0.43	1.27	0.59
0.9	0.85	1.26	0.25
0.94	0.87	1.05	0.81
0.93	0.16	1.06	0.71
1.15	0.19	1.15	0.98
0.56	0.58	1.16	0.91
0.34	0.89	0.55	0.44
0.28	0.89	1.19	0.56
1.15	0.82	1.25	0.79
0.97	0.97	1.36	0.64
0.64	0.99	1.08	0.89
0.42	1.06	1.12	0.46
0.56	1.15	1.16	0.83
1.15	1.36	1.38	0.88
1.18	0.73	0.94	0.79
1.09	0.29	0.75	0.69
1.07	0.38	0.56	0.92
0.58	0.46	0.58	1.38
0.25	0.59	0.44	0.94
1.03	0.67	0.46	1.16
1.08	0.74	0.59	1.05
0.56	0.79	0.59	0.64
0.34	0.86	1.08	0.58
1.08	0.89	1.15	0.89
0.46	0.54	1.06	1.06
0.38	0.59	1.03	1.07
0.67	0.26	1.14	1.15
1.38	0.99	1.18	1.16
1.49	0.94	1.46	0.39
1.69	0.48	1.79	0.48
1.53	0.46	1.34	0.98
1.46	0.59	0.94	1.28
1.41	0.71	0.96	1.26
1.23	0.73	0.58	1.67
1.27	0.49	0.46	1.56
1.08	0.59	0.48	0.98
1.06	0.53	0.45	0.45
1.15	0.27	0.76	0.58
1.15	0.11	0.58	0.59
0.63	0.16	0.48	0.34
0.38	0.77	0.78	0.26
0.67	0.49	0.59	1.06
0.55	0.75	0.54	1.04
0.56	0.46	0.5	0.65
1.05	0.48	0.56	0.58
1.16	1.08	0.79	0.46
1.08	0.49	0.85	0.48
0.94	0.75	0.87	0.46
0.84	0.89	0.88	0.58
0.83	0.81	0.94	0.67
0.61	0.82	0.96	0.64
0.75	0.76	0.56	0.59
0.51	0.73	1.06	0.35
0.79	0.59	0.94	0.58
0.83	0.67	0.97	0.54
0.94	0.59	0.56	0.59
0.52	0.58	0.78	0.47
0.59	0.64	1.16	0.43
1.16	0.28	1.18	0.28
1.19	0.36	0.67	0.89
0.68	0.38	0.99	0.56
0.61	0.28	1.06	0.41
0.39	0.79	1.12	0.39
0.57	0.72		0.58
	0.59		0.37
	0.59		0.46
	0.57		0.59
			0.43
			0.27
			0.91

## Sheet: Fig.1g
Fig.1g Fiber ratio HU
M059K		U251
siNC	siRECQ1	siNC	siRECQ1		Mann-Whitney Rank Sum Test
1.08	0.89	1.05	0.68		M059K siRECQ1 vs siNC
0.92	0.58	0.99	0.36		Group	N	Missing	Median	0.25	0.75
0.95	0.57	0.58	0.25		Col 1	124	0	0.93	0.672	1.08
1.26	0.56	0.77	0.89		Col 2	127	0	0.64	0.56	0.78
0.78	0.56	1.23	0.64		Mann-Whitney U Statistic= 4114.500
1.37	0.54	1.27	0.68		T = 19383.500 n(small)= 124 n(big)= 127 (P = <0.001)
1.16	0.88	1.59	0.19		The difference in the median values between the two groups is greater than would be expected by chance; there is a statistically significant difference (P = <0.001)
1.39	0.69	1.68	0.36		U251 siRECQ1 vs siNC
1.24	0.78	0.64	0.37		Group	N	Missing	Median	0.25	0.75
1.06	0.76	0.58	0.69		Col 3	129	0	0.94	0.64	1.08
0.92	0.36	0.46	1.51		Col 4	116	0	0.68	0.49	0.867
0.64	0.58	0.99	1.26		Mann-Whitney U Statistic= 5228.000
0.28	0.69	0.97	1.05		T = 12014.000 n(small)= 116 n(big)= 129 (P = <0.001)
1.03	0.54	1.23	0.95		The difference in the median values between the two groups is greater than would be expected by chance; there is a statistically significant difference (P = <0.001)
0.98	0.6	1.02	0.64
0.87	0.58	1.08	0.25
0.59	0.67	1.46	0.67
0.26	0.79	1.34	0.34
0.38	0.86	1.31	0.86
0.64	0.59	1.25	0.55
0.59	0.56	1.06	0.64
1.28	0.67	0.99	0.66
1.31	1.05	0.84	0.75
1.03	1.26	0.68	0.34
0.72	1.13	0.67	0.39
1.24	1.15	0.95	0.34
1.05	0.94	0.97	0.25		Mean+s.e.m., p-value,Mann-Whitney Rank Sum Test, n=3 biological replicates
1.26	0.58	0.15	0.56
1.08	0.66	0.59	0.87
0.94	0.67	0.67	0.76
0.77	0.58	0.58	0.24
0.59	0.49	0.46	0.76
0.68	0.24	0.66	0.46
0.56	0.13	0.64	0.94
0.48	0.56	0.37	0.48
0.81	0.58	0.38	0.64
0.47	0.24	0.58	0.56
0.69	0.68	0.56	0.85
0.45	0.48	0.24	0.56
0.68	0.46	0.23	0.47
0.89	0.58	1.02	0.89
0.97	0.67	1.23	0.85
0.59	0.28	1.05	0.48
0.69	0.26	1.08	0.56
0.88	0.37	1.11	0.64
1.08	0.69	0.95	0.38
1.1	0.28	1.05	1.02
1.06	0.58	0.95	0.94
1.15	0.66	0.96	0.64
1.18	0.94	0.35	0.38
1.37	0.77	0.39	1.31
1.56	0.64	0.37	0.34
1.76	0.59	0.48	0.67
1.28	0.56	1.03	0.64
0.97	0.58	1.02	0.94
0.58	0.36	0.64	0.78
0.94	0.59	0.99	0.76
0.88	1.02	0.87	0.45
0.67	1.06	0.85	0.76
0.38	0.96	0.68	0.64
0.48	0.87	0.59	0.94
0.59	0.56	0.64	0.49
0.45	0.58	0.15	0.46
0.77	1.02	1.14	0.95
0.86	1.06	1.25	0.64
0.68	0.39	1.25	0.78
0.58	0.37	1.26	0.69
0.58	0.58	1.28	1.02
0.96	0.97	0.36	1.34
0.82	0.78	0.34	0.69
0.37	0.46	1.14	0.68
0.58	0.85	0.77	1.05
0.25	0.48	0.68	0.88
0.88	0.94	0.95	0.76
1.07	0.55	0.64	0.45
0.56	0.68	1.18	0.39
1.15	0.64	1.16	0.15
1.28	0.25	0.64	0.58
1.36	0.26	0.58	0.98
0.99	0.38	1.09	0.78
0.87	0.34	1.28	0.76
0.89	1.03	0.97	0.49
1.15	1.08	1.48	0.58
1.16	0.28	1.67	0.45
1.27	0.67	1.64	0.65
1.08	0.66	1.25	0.68
1.06	1.06	0.95	0.89
0.58	0.65	0.85	0.75
0.94	0.85	0.56	0.43
1.26	1.06	0.94	0.75
1.38	0.64	0.64	0.59
0.68	0.97	0.64	0.76
0.87	0.58	0.28	0.58
0.96	0.59	0.49	0.96
0.87	0.46	0.97	1.03
1.26	0.75	0.95	0.69
1.26	0.74	0.69	0.67
1.57	0.76	0.75	0.78
0.68	0.72	1.03	0.72
0.78	0.61	0.95	0.71
0.66	0.68	1.26	1.14
0.85	0.65	0.67	1.06
0.44	0.35	0.69	0.36
0.63	1.06	0.94	1.05
0.67	1.25	1.34	0.95
0.89	0.63	0.39	1.26
0.95	0.44	1.25	0.35
0.97	0.64	0.95	0.55
1.02	0.66	0.58	0.85
1.01	0.58	1.02	0.64
0.88	1.25	0.37	0.68
1.06	0.99	0.58	0.79
1.08	0.45	0.69	1.04
1.16	0.85	0.54	1.28
0.96	0.67	0.98	0.69
0.97	0.64	0.95	0.81
0.68	0.59	0.89
0.75	0.58	0.86
0.58	0.64	0.69
0.98	0.69	1.03
1.02	0.68	0.64
1.26	0.58	0.98
1.05	0.26	0.87
0.96	0.34	0.68
	0.16	0.59
	0.58	0.94
	0.61	1.13
		1.25
		1.26

## Sheet: Fig.2b
Fig.2b clone assay
0uM		10uM		20uM		50uM
siNC	siRECQ1	siNC	siRECQ1	siNC	siRECQ1	siNC	siRECQ1
1	0.97	0.96	0.81	0.85	0.49	0.75	0.26
1.02	0.98	0.9	0.84	0.87	0.43	0.66	0.27
1.01	1.01	0.95	0.86	0.82	0.44	0.69	0.21
	t-test
	siRECQ1 vs siNC
	Group Name	N	Missing	Mean	Std Dev
	Col 1	3	0	0.7	0.0458
	Col 2	3	0	0.247	0.0321
	Two-tailed P-value = 0.000292
	The difference in the mean values of the two groups is greater than would be expected by chance; there is a statistically significant difference between the input groups (P = <0.001).
	Mean+s.d., p-value, two-tailed t-test, n=3 biological replicates

## Sheet: Fig.2c
Fig.2c CCK8
0uM		10uM		20uM		50uM
siNC	siRECQ1	siNC	siRECQ1	siNC	siRECQ1	siNC	siRECQ1
1.06	0.99	0.95	0.82	0.9	0.47	0.71	0.25
0.98	1.05	0.95	0.81	0.87	0.43	0.68	0.23
1.02	1.01	0.93	0.85	0.89	0.42	0.69	0.26
	t-test
	siRECQ1 vs siNC
	Group Name	N	Missing	Mean	Std Dev
	Col 7	3	0	0.693	0.0153
	Col 8	3	0	0.247	0.0153
	Two-tailed P-value = 0.00000363
	The difference in the mean values of the two groups is greater than would be expected by chance; there is a statistically significant difference between the input groups (P = <0.001).
	Mean+s.d., p-value, two-tailed t-test, n=3 biological replicates

## Sheet: Fig.2e
Fig.2e EdU
	NT		MMS
	siNC	siRECQ1	siNC	siRECQ1
	30.8	29.6	25.6	14.4
	28.5	28.9	23.7	12.8
	30.7	28.3	25.5	13.2
	t-test
	NT siRECQ1 vs siNC
	Group Name	N	Missing	Mean	Std Dev
	Col 1	3	0	30	1.3
	Col 2	3	0	28.933	0.651				Mean+s.d., p-value, two-tailed t-test, n=3 biological replicates
	Two-tailed P-value = 0.295
	The difference in the mean values of the two groups is not great enough to reject the possibility that the difference is due to random sampling variability. There is not a statistically significant difference between the input groups (P = 0.295).
	MMS siRECQ1 vs siNC
	Group Name	N	Missing	Mean	Std Dev	SEM
	Col 3	3	0	24.933	1.069	0.617
	Col 4	3	0	13.467	0.833	0.481
	Two-tailed P-value = 0.000183
	The difference in the mean values of the two groups is greater than would be expected by chance; there is a statistically significant difference between the input groups (P = <0.001).

## Sheet: Fig.3a
Fig.3a γ-H2AX
	NT		MMS
	siNC	siRECQ1	siNC	siRECQ1
%	10.6	7.7	23.4	72.6
	7.8	12.3	19.5	80.3
	8.1	14.6	21.3	76.2
	t-test
	NT siRECQ1 vs siNC
	Group Name	N	Missing	Mean	Std Dev
	Col 1	3	0	8.833	1.537
	Col 2	3	0	11.533	3.513		Mean+s.d., p-value, two-tailed t-test, n=3 biological replicates
	Two-tailed P-value = 0.290
	The difference in the mean values of the two groups is not great enough to reject the possibility that the difference is due to random sampling variability. There is not a statistically significant difference between the input groups (P = 0.290).
	MMS siRECQ1 vs siNC
	Group Name	N	Missing	Mean	Std Dev
	Col 3	3	0	21.4	1.952
	Col 4	3	0	76.367	3.853
	Two-tailed P-value = 0.000222
	The difference in the mean values of the two groups is greater than would be expected by chance; there is a statistically significant difference between the input groups (P = <0.001).

[truncated: 19 more sheets: Fig.3b, Fig.4b, Fig.4c, Fig.4d, Fig.4e, Fig.4f, Fig.4g, Fig.4h, Fig.5b, Fig. 5d, Fig.5e, Fig.5g, Fig.hi, Fig.5i, Fig.6a, Fig.6b, Fig.6c, Fig.6d, Fig.7b]
