# Supplementary figures and images for: RECQ1 Promotes Stress Resistance and DNA Replication Progression Through PARP1 Signaling Pathway in Glioblastoma
Source: Frontiers journal article supplement (doi:10.3389/fcell.2021.714868), 2021-07-26

Supplementary Figure - Uncropped scans.

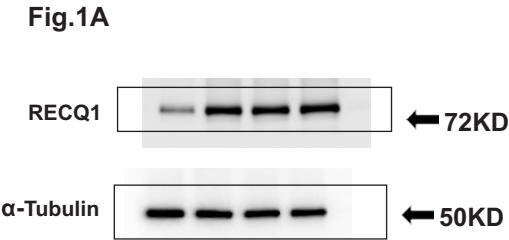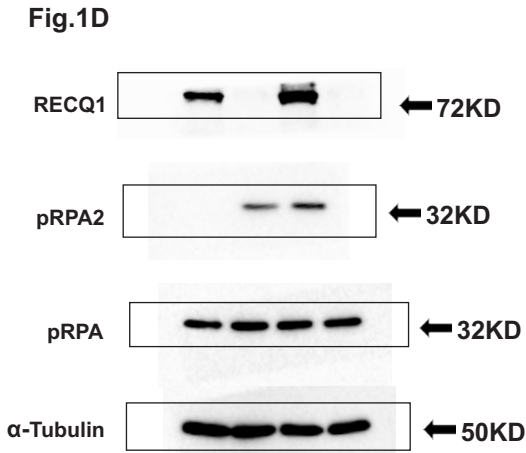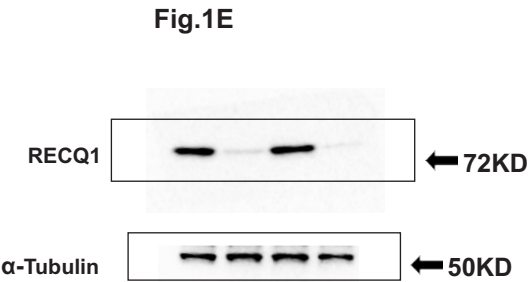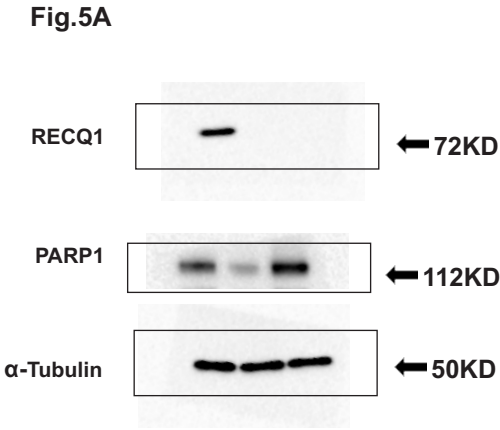

Supplement: Data_Sheet_1.ZIP [file Data_Sheet_1.ZIP]
